# Supplementary material
Source: PubMed Central journal article supplement (PMC5837016)
Supplement: NIHMS75699-supplement-Supplemental_Material.pdf [file NIHMS75699-supplement-Supplemental_Material.pdf]

SUPPLEMENTAL MATERIAL

**High-sensitivity cardiac troponin I and the diagnosis of coronary artery disease in patients with suspected angina pectoris**

Philip D. Adamson\*<sup>1</sup>, Amanda Hunter\*<sup>1</sup>, Debbie M. Madsen<sup>2</sup>, Anoop S.V. Shah<sup>1</sup>, David A. McAllister<sup>3</sup>, Tania A. Pawade<sup>1</sup>, Michelle C. Williams<sup>4</sup>, Colin Berry<sup>5</sup>, Nicholas A. Boon<sup>1</sup>, Marcus Flather<sup>6</sup>, John Forbes<sup>7</sup>, Scott McLean<sup>8</sup>, Giles Roditi<sup>5</sup>, Adam D. Timmis<sup>9</sup>, Edwin J.R. van Beek<sup>1,4</sup>, Marc R. Dweck<sup>1</sup>, Hans Mickley<sup>2</sup>, Nicholas L. Mills\*\*<sup>1</sup> and David E. Newby\*\*<sup>1</sup>.

<sup>1</sup>BHF Centre for Cardiovascular Science, University of Edinburgh, Edinburgh, United Kingdom

<sup>2</sup>Department of Cardiology, Odense University Hospital, Odense C, Denmark

<sup>3</sup>Institute of Health and Wellbeing, University of Glasgow, Glasgow, United Kingdom

<sup>4</sup>Clinical Research Imaging Centre, University of Edinburgh, Edinburgh, United Kingdom

<sup>5</sup>Institute of Clinical Sciences, University of Glasgow, Glasgow, United Kingdom

<sup>6</sup>Norwich Medical School, University of East Anglia, Norwich, United Kingdom

<sup>7</sup>Health Research Institute, University of Limerick, Limerick, Ireland

<sup>8</sup>National Health Service, Fife, United Kingdom

<sup>9</sup>William Harvey Research Institute, Queen Mary University of London, London, United Kingdom

\*Drs Adamson and Hunter contributed equally to this work.

\*\*Equal contribution

**Correspondence to:**

Dr Philip D. Adamson

Room SU 305

BHF Centre for Cardiovascular Science

Chancellor's Building

University of Edinburgh

49 Little France Cres

Edinburgh

EH16 4SB

UNITED KINGDOM

Email: [philip.adamson@ed.ac.uk](mailto:philip.adamson@ed.ac.uk)

**Supplementary Table 1. Baseline characteristics of biomarker sub-study and intervention arm of the SCOTHEART trial**

|                                                | All Participants with CCTA | CCTA + Troponin | p-value |
|------------------------------------------------|----------------------------|-----------------|---------|
| <b>n</b>                                       | 1781                       | 937             |         |
| <b>Age (mean (SD))</b>                         | 57.57 (9.47)               | 57.79 (9.55)    | 0.57    |
| <b>Male (%)</b>                                | 998 (56.0)                 | 533 (56.9)      | 0.702   |
| <b>BMI (mean (SD))</b>                         | 29.63 (5.64)               | 29.62 (5.54)    | 0.985   |
| <b>Pre-existing CHD (%)</b>                    | 162 (9.1)                  | 78 (8.3)        | 0.547   |
| <b>Hypertension (%)</b>                        | 612 (34.7)                 | 336 (36.2)      | 0.485   |
| <b>Hyperlipidemia (%)</b>                      | 1,083 (60.8)               | 565 (60.3)      | 0.828   |
| <b>Diabetes mellitus (%)</b>                   | 196 (11.0)                 | 98 (10.5)       | 0.711   |
| <b>Smoking habit* (%)</b>                      | 928 (52.1)                 | 514 (54.9)      | 0.19    |
| <b>Family history of CHD (%)</b>               | 770 (43.6)                 | 394 (42.5)      | 0.629   |
| <b>Predicted 10-year CHD risk‡ (mean (SD))</b> | 17.9 (11.0)                | 18.2 (11.1)     | 0.407   |
| <b>Anginal Symptoms§ (%)</b>                   |                            |                 | 0.011   |
| Atypical angina                                | 436 (24.5)                 | 221 (23.6)      |         |
| Non-anginal                                    | 687 (38.6)                 | 317 (33.8)      |         |
| Typical angina                                 | 658 (36.9)                 | 399 (42.6)      |         |
| <b>Exercise ECG Performed (%)</b>              | 1512 (85.1)                | 770 (82.3)      | 0.059   |
| Normal                                         | 925 (65.2)                 | 475 (66.2)      |         |
| Inconclusive                                   | 257 (18.1)                 | 113 (15.7)      |         |
| Abnormal°                                      | 236 (16.6)                 | 130 (18.1)      |         |

CCTA, coronary computed tomography angiography; SD, standard deviation; BMI, body mass index; CHD, coronary heart disease; \*Current and ex-smokers; ‡ASSIGN score; §European Society of Cardiology Criteria, ECG, electrocardiography.

**Supplementary Table 2. Multi-variable predictors of obstructive coronary artery disease**

| <b>Odds Ratio for Identifying Obstructive CAD on CCTA (95% CI)</b> |                         |                         |                         |                         |                         |                         |
|--------------------------------------------------------------------|-------------------------|-------------------------|-------------------------|-------------------------|-------------------------|-------------------------|
|                                                                    | <b>Model 1</b>          | <b>Model 2</b>          | <b>Model 3</b>          | <b>Model 4</b>          | <b>Model 5</b>          | <b>Model 6</b>          |
| <b>Log<sub>2</sub> (hs-cTnI)</b>                                   | 1.71<br>( 1.51 - 1.96 ) | 1.39<br>( 1.21 - 1.6 )  | 1.35<br>( 1.17 - 1.56 ) | 1.35<br>( 1.17 - 1.57 ) | 1.3<br>( 1.11 - 1.55 )  | 1.27<br>( 1.08 - 1.52 ) |
| <b>Age</b>                                                         |                         | 1.07<br>( 1.05 - 1.09 ) | 1.05<br>( 1.03 - 1.07 ) | 1.06<br>( 1.03 - 1.08 ) | 1.04<br>( 1.02 - 1.07 ) | 0.99<br>( 0.97 - 1.02 ) |
| <b>Male gender</b>                                                 |                         | 3.86<br>( 2.72 - 5.57 ) | 3.88<br>( 2.7 - 5.65 )  | 4.04<br>( 2.78 - 5.97 ) | 3.67<br>( 2.37 - 5.8 )  | 1.64<br>( 1.05 - 2.58 ) |
| <b>Chest pain symptom</b>                                          |                         |                         |                         |                         |                         |                         |
| <b>Atypical angina</b>                                             |                         |                         | 1.82<br>( 1.11 - 3 )    | 1.47<br>( 0.88 - 2.47 ) | 1.11<br>( 0.61 - 2.03 ) | 1.31<br>( 0.73 - 2.34 ) |
| <b>Typical angina</b>                                              |                         |                         | 4.28<br>( 2.85 - 6.53 ) | 3.13<br>( 2.03 - 4.9 )  | 2.05<br>( 1.21 - 3.49 ) | 2.78<br>( 1.69 - 4.62 ) |
| <b>Diabetes mellitus</b>                                           |                         |                         |                         | 0.83<br>( 0.48 - 1.42 ) | 1.08<br>( 0.56 - 2.03 ) | 0.59<br>( 0.31 - 1.08 ) |
| <b>Hypertension</b>                                                |                         |                         |                         | 1.03<br>( 0.73 - 1.46 ) | 1.08<br>( 0.71 - 1.62 ) | 0.98<br>( 0.66 - 1.45 ) |
| <b>Hyperlipidaemia</b>                                             |                         |                         |                         | 2.43<br>( 1.65 - 3.63 ) | 2.16<br>( 1.35 - 3.51 ) | 1.8<br>( 1.16 - 2.82 )  |
| <b>Smoking status</b>                                              |                         |                         |                         |                         |                         |                         |
| <b>Ex-smoker</b>                                                   |                         |                         |                         | 0.86<br>( 0.58 - 1.25 ) | 1.02<br>( 0.65 - 1.59 ) | 0.65<br>( 0.42 - 1 )    |
| <b>Current smoker</b>                                              |                         |                         |                         | 1.4<br>( 0.87 - 2.22 )  | 1.56<br>( 0.9 - 2.68 )  | 1.07<br>( 0.62 - 1.83 ) |
| <b>Family history of CHD</b>                                       |                         |                         |                         | 1.26<br>( 0.89 - 1.79 ) | 1.47<br>( 0.97 - 2.22 ) | 1.03<br>( 0.69 - 1.55 ) |
| <b>Exercise ECG result</b>                                         |                         |                         |                         |                         |                         |                         |
| <b>Inconclusive</b>                                                |                         |                         |                         |                         | 1.1<br>( 0.64 - 1.88 )  |                         |
| <b>Abnormal</b>                                                    |                         |                         |                         |                         | 2.96<br>( 1.77 - 4.98 ) |                         |
| <b>Log<sub>2</sub> (Calcium score)</b>                             |                         |                         |                         |                         |                         | 1.53<br>( 1.42 - 1.65 ) |

CAD, coronary artery disease; CCTA, coronary computed tomography angiography; CI, confidence interval; hs-cTnI, high-sensitivity cardiac troponin I; CHD, coronary heart disease; ECG, electrocardiography.

**Supplementary Table 3. Characteristics of SCOT-HEART biomarker sub-study cohort with CAD Consortium low prevalence cohort**

|                                  | <b>CAD Consortium Cohort</b> | <b>SCOT-HEART Biomarker Sub-study Cohort</b> |
|----------------------------------|------------------------------|----------------------------------------------|
| <b>n</b>                         | 4,426                        | 937                                          |
| <b>Age, years</b>                | 57.2±12                      | 57.8±9.5                                     |
| <b>Male (%)</b>                  | 54.4                         | 56.9                                         |
| <b>Typical angina (%)</b>        | 17.2                         | 42.6                                         |
| <b>Atypical angina (%)</b>       | 61.0                         | 23.6                                         |
| <b>Non-anginal symptoms (%)</b>  | 21.8                         | 33.8                                         |
| <b>≥70% stenosis on CCTA (%)</b> | 12.8                         | 28.5                                         |

Values are percentage or mean ± standard deviation. CAD, coronary artery disease; SD, standard deviation; CA, coronary angiography; CCTA, coronary computed tomography angiography.

**Supplementary Table 4. Baseline characteristics of patients with suspected angina stratified by cardiac troponin using the Abbott hs-cTnI Assay**

|                                 | Cardiac troponin I concentrations by quintile (range [ng/L])<br>(Abbott hs-cTnI Assay) |                     |                      |                      |                       |
|---------------------------------|----------------------------------------------------------------------------------------|---------------------|----------------------|----------------------|-----------------------|
|                                 | Q1 [ $\leq 1$ ng/L]                                                                    | Q2 [1.1-1.9ng/L]    | Q3 [2-2.5ng/L]       | Q4 [2.6-4.1ng/L]     | Q5 [ $\geq 4.2$ ng/L] |
| <b>n</b>                        | 198                                                                                    | 188                 | 183                  | 178                  | 184                   |
| <b>Age, years</b>               | 54.25 (9.40)                                                                           | 55.67 (10.33)       | 58.28 (9.05)         | 59.80 (9.04)         | 60.51 (8.68)          |
| <b>Male, %</b>                  | 62 (31.3)                                                                              | 103 (54.8)          | 104 (56.8)           | 123 (69.1)           | 139 (75.5)            |
| <b>Chest pain symptom, %</b>    |                                                                                        |                     |                      |                      |                       |
| <b>Non-anginal</b>              | 72 (36.4)                                                                              | 75 (39.9)           | 64 (35.0)            | 58 (32.6)            | 46 (25.0)             |
| <b>Atypical angina</b>          | 55 (27.8)                                                                              | 47 (25.0)           | 48 (26.2)            | 32 (18.0)            | 39 (21.2)             |
| <b>Typical angina</b>           | 71 (35.9)                                                                              | 66 (35.1)           | 71 (38.8)            | 88 (49.4)            | 99 (53.8)             |
| <b>BMI</b>                      | 29.20 (5.72)                                                                           | 29.68 (5.87)        | 29.93 (5.64)         | 29.57 (5.17)         | 29.64 (5.50)          |
| <b>Pre-existing CHD, %</b>      | 10 (5.1)                                                                               | 16 (8.5)            | 14 (7.7)             | 20 (11.2)            | 19 (10.3)             |
| <b>Hypertension, %</b>          | 55 (27.8)                                                                              | 50 (27.0)           | 62 (34.1)            | 82 (46.3)            | 85 (47.0)             |
| <b>Hyperlipidemia, %</b>        | 101 (51.0)                                                                             | 103 (54.8)          | 122 (66.7)           | 109 (61.2)           | 125 (67.9)            |
| <b>Diabetes mellitus, %</b>     | 23 (11.6)                                                                              | 18 (9.6)            | 21 (11.5)            | 15 (8.4)             | 22 (12.0)             |
| <b>Current smoker, %</b>        | 37 (18.7)                                                                              | 46 (24.5)           | 34 (18.6)            | 26 (14.6)            | 31 (16.8)             |
| <b>Family history of CHD, %</b> | 89 (45.9)                                                                              | 93 (49.7)           | 83 (45.9)            | 67 (37.9)            | 62 (33.9)             |
| <b>10-year CHD risk*</b>        | 11.00 [6.00, 18.00]                                                                    | 14.50 [8.75, 23.00] | 16.00 [10.50, 23.00] | 17.00 [13.00, 25.00] | 19.00 [15.00, 28.25]  |

Data are mean (standard deviation), median [IQR], or value (%); BMI, body mass index; CHD, coronary heart disease.

\*ASSIGN Score (see <http://assign-score.com/>)

**Supplementary Table 5. Exercise electrocardiography and coronary computed tomography findings by troponin quintile using the Abbott hs-cTnI assay**

|                                  | Cardiac troponin I concentrations by quintile (range [ng/L])<br>(Abbott hs-cTnI Assay) |                      |                      |                      |                       |
|----------------------------------|----------------------------------------------------------------------------------------|----------------------|----------------------|----------------------|-----------------------|
|                                  | Q1 [ $\leq$ 1ng/L]                                                                     | Q2 [1.1-1.9ng/L]     | Q3 [2-2.5ng/L]       | Q4 [2.6-4.1ng/L]     | Q5 [ $\geq$ 4.2ng/L]  |
| <b>n</b>                         | 198                                                                                    | 188                  | 183                  | 178                  | 184                   |
| <b>Exercise ECG performed, %</b> | 171 (86.4)                                                                             | 159 (84.6)           | 143 (78.1)           | 142 (80.7)           | 144 (78.3)            |
| <b>Exercise ECG outcome</b>      |                                                                                        |                      |                      |                      |                       |
| <b>Normal, %</b>                 | 113 (70.2)                                                                             | 107 (73.3)           | 91 (67.9)            | 88 (65.7)            | 71 (51.8)             |
| <b>Inconclusive, %</b>           | 26 (16.1)                                                                              | 19 (13.0)            | 23 (17.2)            | 23 (17.2)            | 27 (19.7)             |
| <b>Abnormal, %</b>               | 22 (13.7)                                                                              | 20 (13.7)            | 20 (14.9)            | 23 (17.2)            | 39 (28.5)             |
| <b>Coronary calcium score</b>    | 0.00 [0.00, 47.00]                                                                     | 22.00 [0.00, 147.25] | 24.00 [0.00, 201.00] | 65.00 [0.25, 430.25] | 151.00 [8.00, 780.50] |
| <b>Coronary disease on CT</b>    |                                                                                        |                      |                      |                      |                       |
| <b>No significant CHD, %</b>     | 101 (51.5)                                                                             | 73 (38.8)            | 68 (37.2)            | 50 (28.1)            | 30 (16.4)             |
| <b>Non-obstructive CHD, %</b>    | 71 (36.2)                                                                              | 77 (41.0)            | 69 (37.7)            | 62 (34.8)            | 65 (35.5)             |
| <b>Obstructive CHD, %</b>        | 24 (12.2)                                                                              | 38 (20.2)            | 46 (25.1)            | 66 (37.1)            | 88 (48.1)             |
| <b>SSS score</b>                 | 0.00 [0.00, 3.00]                                                                      | 1.00 [0.00, 7.00]    | 1.00 [0.00, 7.00]    | 4.00 [0.00, 11.00]   | 7.00 [2.00, 14.00]    |

Data are median [IQR], or value (%); ECG, electrocardiography; IQR, interquartile range; CHD, coronary heart disease; SSS, segment stenosis score.

**Supplementary Table 6. Model statistics using the Abbott hs-cTnI assay**

| Performance measure                       | CADC Model             | CADC Model with troponin |
|-------------------------------------------|------------------------|--------------------------|
| <b>Overall</b>                            |                        |                          |
| <b>Coefficient of Discrimination</b>      | 0.230                  | 0.268                    |
| <b>Brier score</b>                        | 0.161                  | 0.155                    |
| <b>Discrimination</b>                     |                        |                          |
| <b>C-statistic [95% CI]</b>               | 0.791<br>[0.760-0.822] | 0.806<br>[0.776-0.836]*  |
| <b>Calibration (Hosmer-Lemeshow Test)</b> |                        |                          |
| <b>Chi-square</b>                         | 15.35                  | 14.06                    |
| <b>P-value</b>                            | 0.053                  | 0.080                    |
| <b>NRI (Continuous) [95% CI]</b>          |                        | 0.537<br>[0.398-0.675]   |
| <b>NRI (Categorical) [95% CI]</b>         | N/A                    | 0.086<br>[0.054-0.118]   |
| <b>Statistics at 10% PTP threshold</b>    |                        |                          |
| <b>Sensitivity</b>                        | 0.947                  | 0.950                    |
| <b>Specificity</b>                        | 0.371                  | 0.434                    |
| <b>PPV</b>                                | 0.372                  | 0.398                    |
| <b>NPV</b>                                | 0.946                  | 0.957                    |

CADC, Coronary Artery Disease Consortium; CI, confidence interval; NRI, net reclassification improvement; PTP, pre-test probability; PPV, positive predictive value; NPV, negative predictive value; \*p = 0.003 that true difference in AUC is not equal to 0.

**Supplementary Table 7. Net reclassification with the addition of cardiac troponin I to the CADC model (Abbott Assay)**

| <b>Outcome: No Obstructive Disease</b>           |                            |                    |                               |                     |                |
|--------------------------------------------------|----------------------------|--------------------|-------------------------------|---------------------|----------------|
| <b>CADC Model with cardiac troponin</b>          |                            |                    |                               |                     |                |
|                                                  |                            | Low Risk<br>(<10%) | Intermediate Risk<br>(10-90%) | High Risk<br>(≥90%) | % Reclassified |
| <b>CADC Model</b>                                | Low Risk (<10%)            | 234                | 13                            | 0                   | 5              |
|                                                  | Intermediate Risk (10-90%) | 55                 | 364                           | 0                   | 13             |
|                                                  | High Risk (≥90%)           | 0                  | 0                             | 0                   | 0              |
| <b>Outcome: Obstructive Disease</b>              |                            |                    |                               |                     |                |
| <b>CADC Model with cardiac troponin</b>          |                            |                    |                               |                     |                |
|                                                  |                            | Low Risk<br>(<10%) | Intermediate Risk<br>(10-90%) | High Risk<br>(≥90%) | % Reclassified |
| <b>CADC Model</b>                                | Low Risk (<10%)            | 12                 | 2                             | 0                   | 14             |
|                                                  | Intermediate Risk (10-90%) | 1                  | 242                           | 5                   | 2              |
|                                                  | High Risk (≥90%)           | 0                  | 0                             | 0                   | 0              |
| NRI(Continuous) [95% CI]: 0.5366 [0.3979-0.6752] |                            |                    |                               |                     |                |
| NRI(Categorical) [95% CI]: 0.086 [0.0542-0.1177] |                            |                    |                               |                     |                |

CADC, Coronary Artery Disease Consortium; NRI, net reclassification improvement; CI, confidence interval.



**Supplementary Table 8. Baseline characteristics in external validation cohort stratified by cardiac troponin using the Abbott hs-cTnI Assay**

| Cardiac troponin I concentrations by quintile (range [ng/L])<br>(Abbott hs-cTnI Assay) |               |                 |                 |                 |               |               |
|----------------------------------------------------------------------------------------|---------------|-----------------|-----------------|-----------------|---------------|---------------|
|                                                                                        | Q1<br>(≤3.3)  | Q2<br>(3.4-4.0) | Q3<br>(4.1-4.7) | Q4<br>(4.8-6.8) | Q5<br>(>6.8)  | Total Cohort  |
| n                                                                                      | 104           | 111             | 81              | 88              | 103           | 487           |
| Age, years                                                                             | 53.38 (10.07) | 56.30 (9.33)    | 58.59 (10.10)   | 60.74 (10.89)   | 62.82 (12.32) | 58.24 (11.07) |
| Male, %                                                                                | 40 (38.5)     | 45 (40.5)       | 46 (56.8)       | 55 (62.5)       | 76 (73.8)     | 262 (53.8)    |
| Chest pain symptom, %                                                                  |               |                 |                 |                 |               |               |
| Non-anginal                                                                            | 32 (30.8)     | 29 (26.1)       | 25 (30.9)       | 23 (26.1)       | 29 (28.2)     | 138 (28.3)    |
| Atypical angina                                                                        | 33 (31.7)     | 47 (42.3)       | 24 (29.6)       | 26 (29.5)       | 28 (27.2)     | 158 (32.4)    |
| Typical angina                                                                         | 39 (37.5)     | 35 (31.5)       | 32 (39.5)       | 39 (44.3)       | 46 (44.7)     | 191 (39.2)    |
| Obstructive CHD, %                                                                     | 8 (7.7)       | 15 (13.5)       | 11 (13.6)       | 20 (22.7)       | 40 (38.8)     | 94 (19.3)     |

Data are mean (standard deviation), median [IQR], or value (%); CHD, coronary heart disease.

### Supplementary Figure 1. Consort diagram of biomarker substudy population

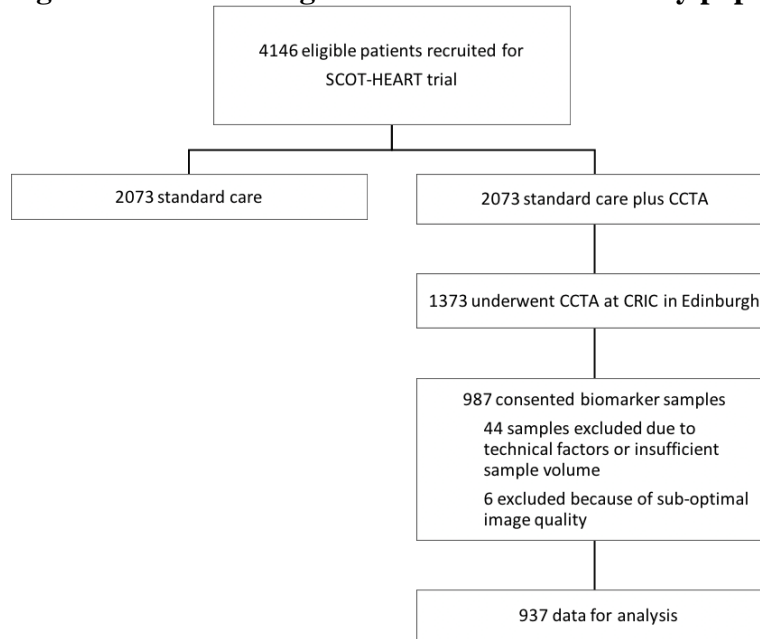

CCTA, coronary computed tomography angiography; CRIC, clinical research imaging centre.

**Supplementary Figure 2. Receiver operating characteristic curve for the prediction of obstructive coronary artery disease**

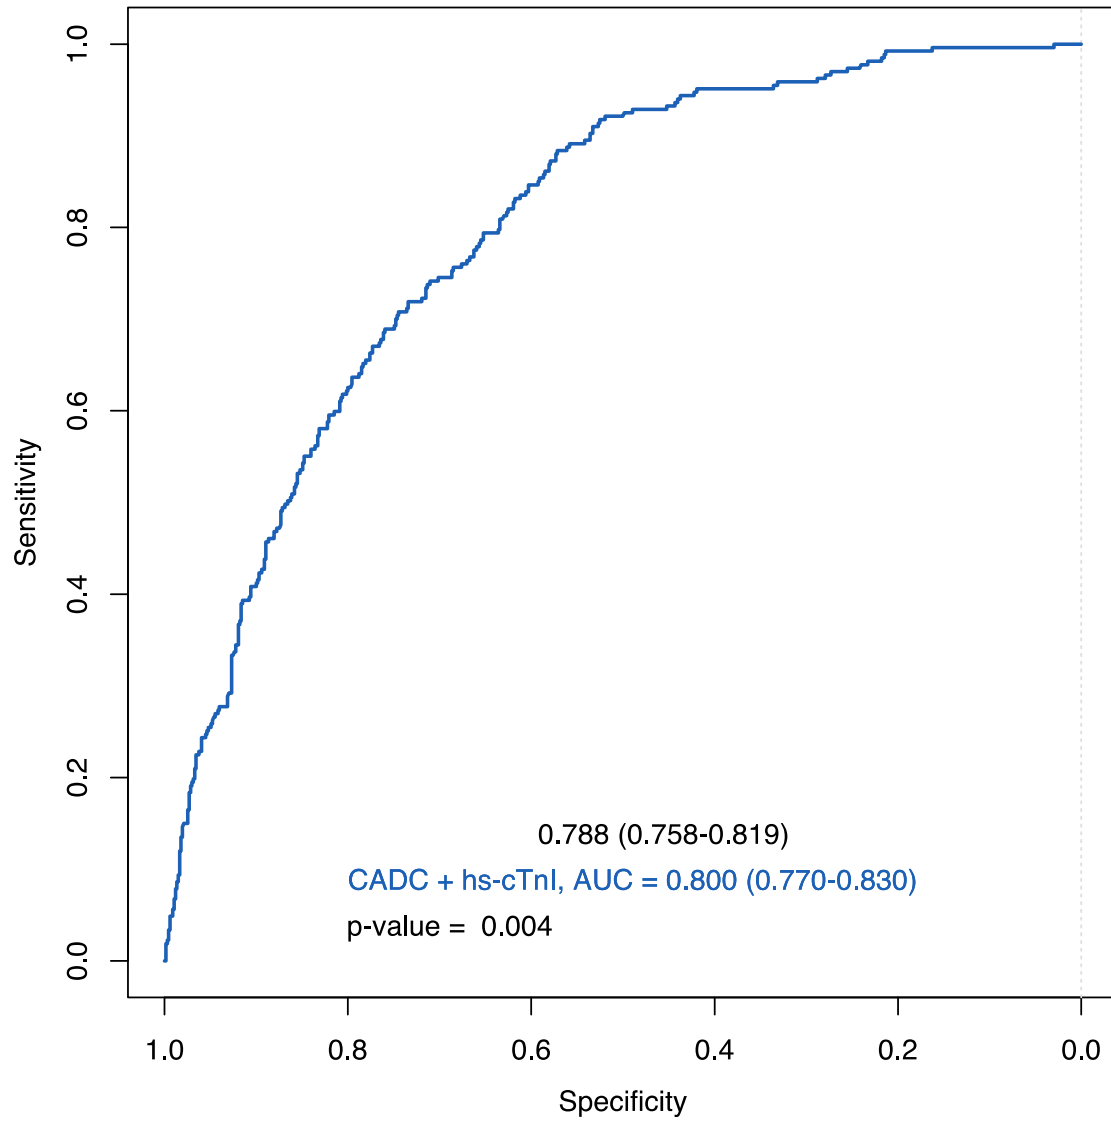

CADC, Coronary Artery Disease Consortium Risk Model; hs-cTnI, high-sensitivity cardiac troponin I; AUC, area under curve

Supplementary Figure 3. Updated Risk Model for Obstructive CAD Incorporating Troponin Quintiles (Abbott hs-cTnI Assay)

Updated Risk Model for Obstructive CAD Incorporating Troponin Quintiles (Abbott hs-cTnI Assay)

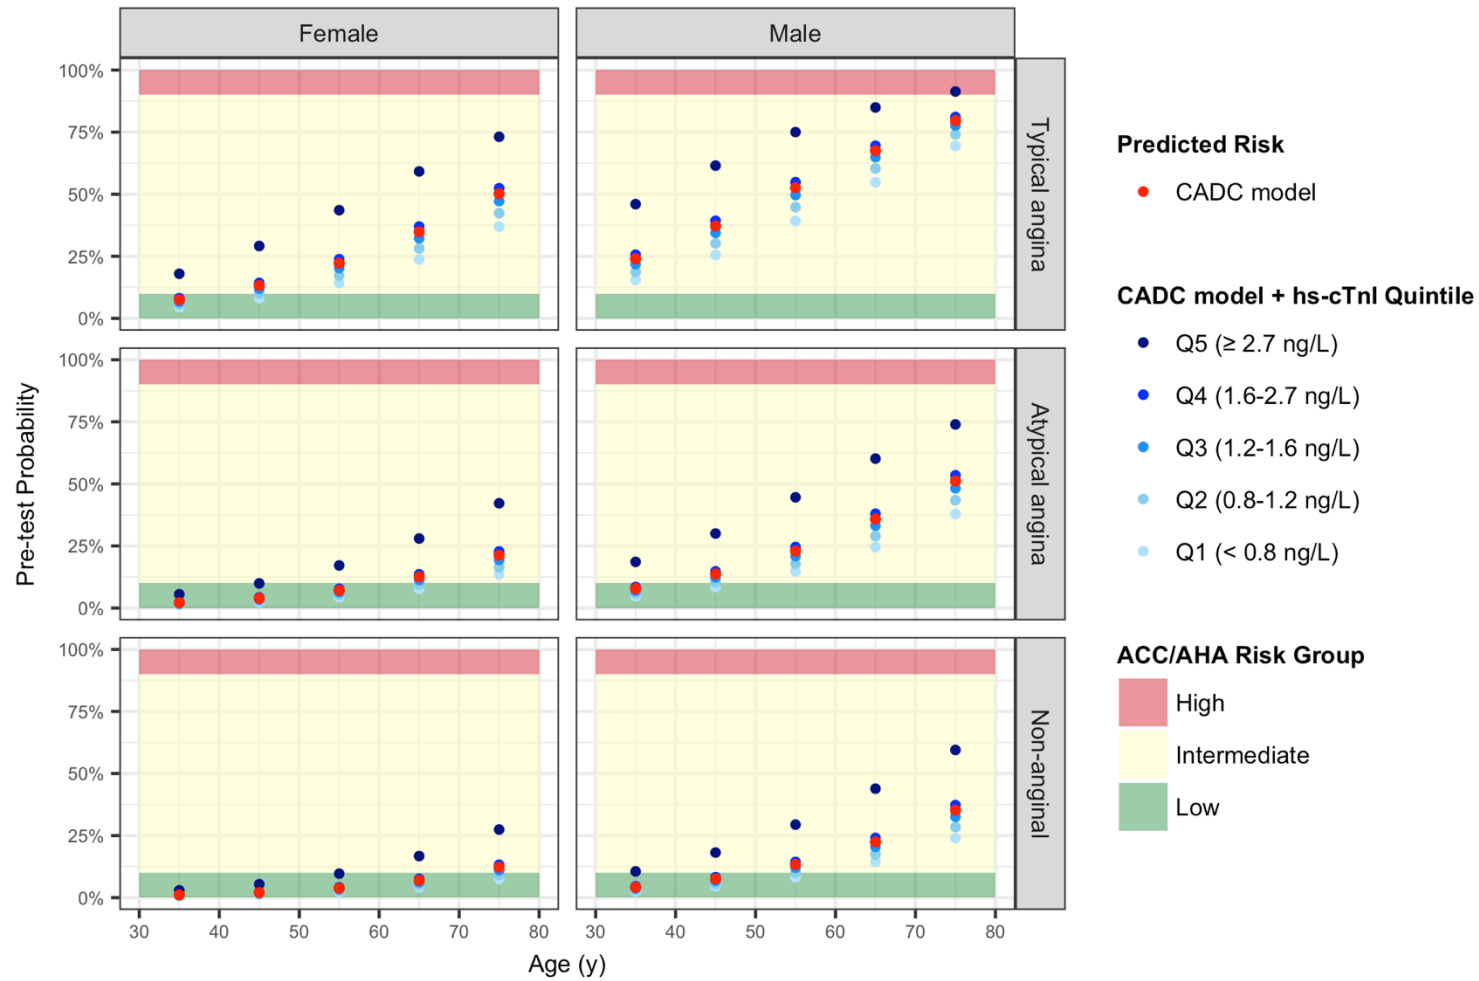

**Supplementary Figure 4. Receiver operating characteristic curve for the prediction of obstructive coronary artery disease (Abbott assay)**

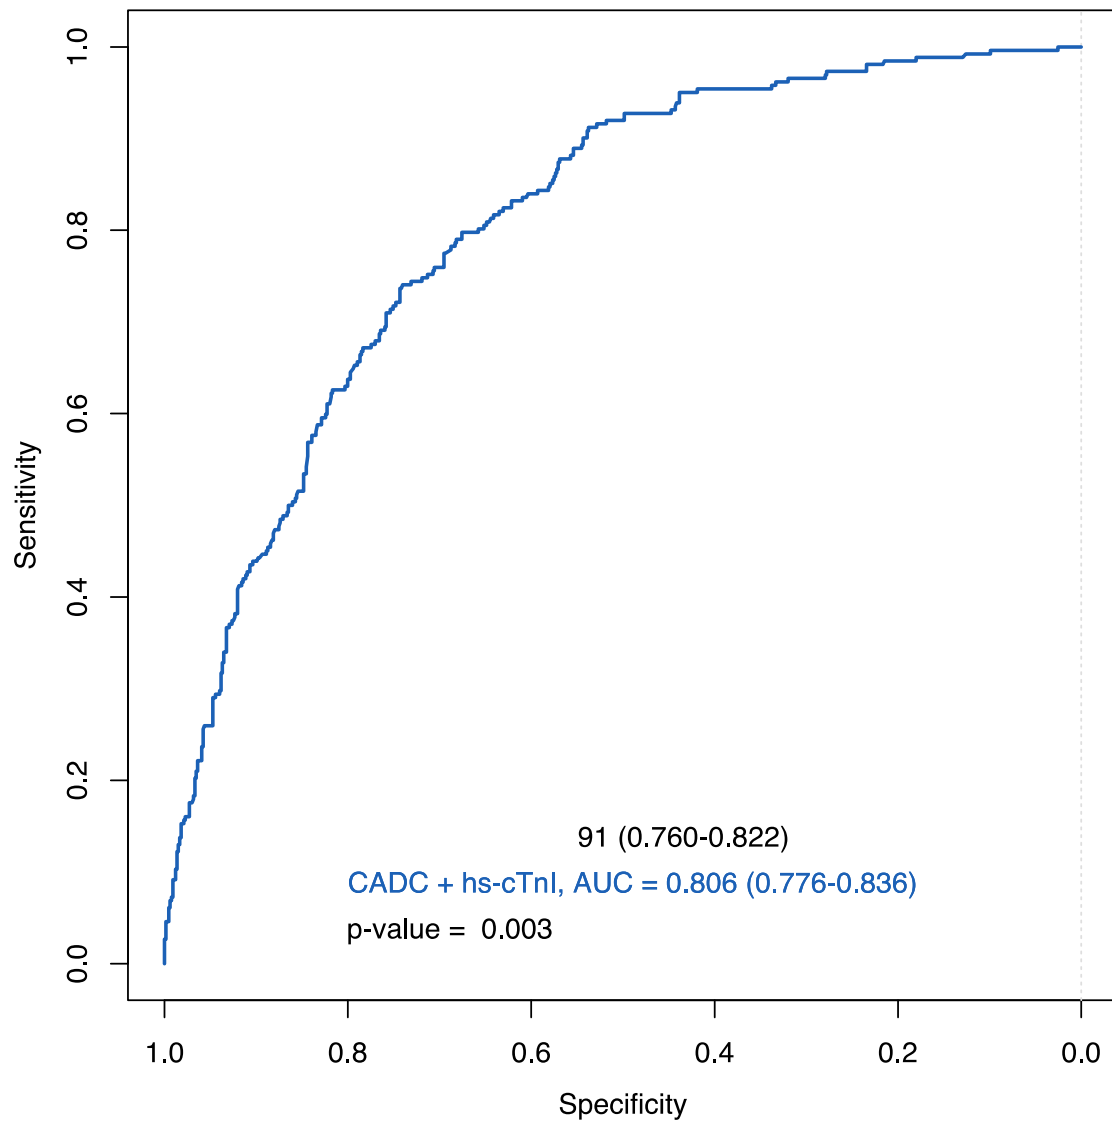

CADC, Coronary Artery Disease Consortium Risk Model; hs-cTnI, high-sensitivity cardiac troponin I; AUC, area under curve.

**Supplementary Figure 5. Receiver operating characteristic curve for the prediction of obstructive coronary artery disease in the external validation cohort (Abbott assay)**

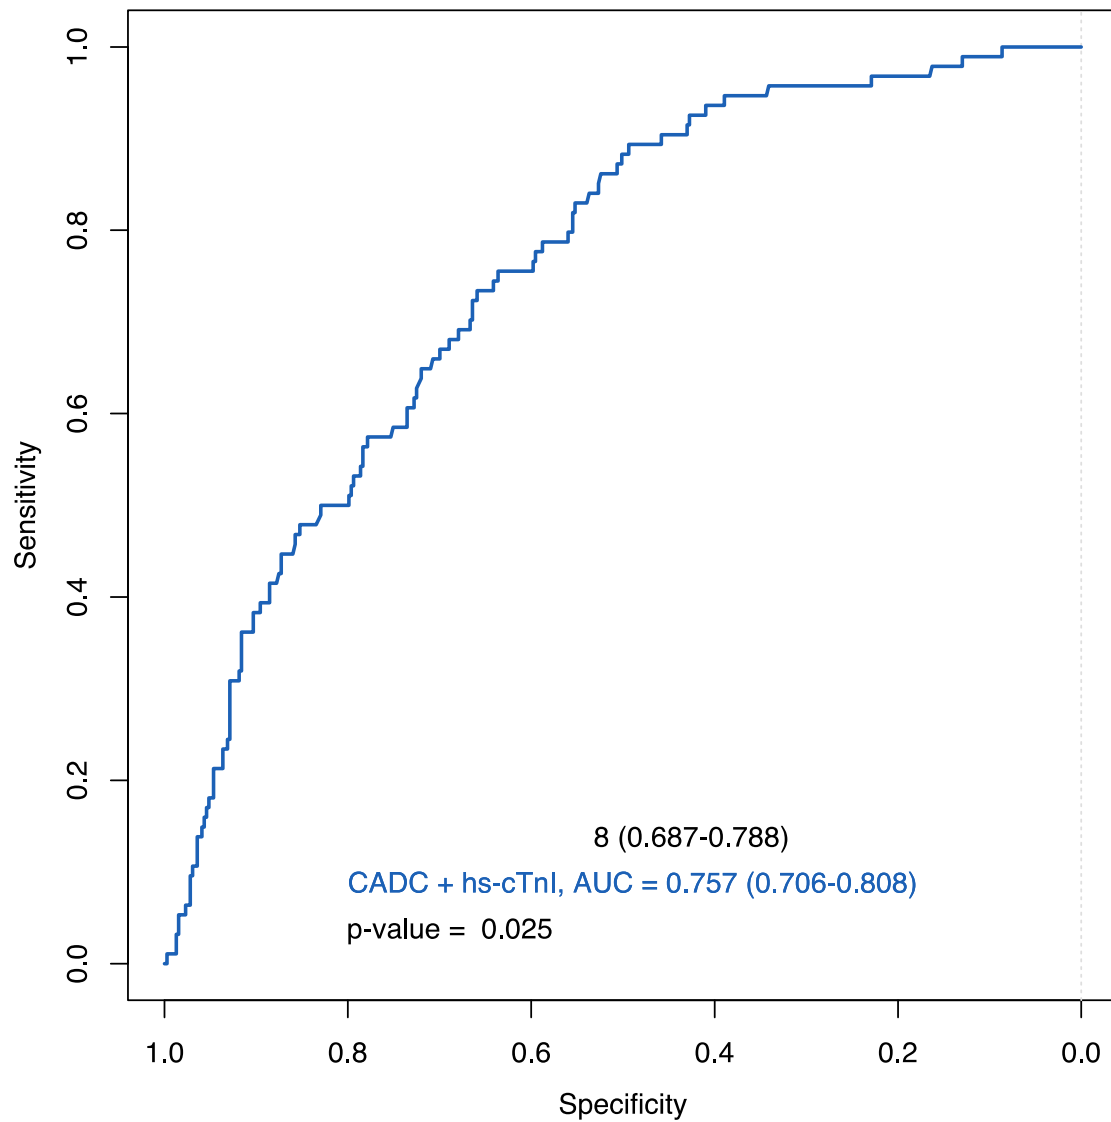

CADC, Coronary Artery Disease Consortium Risk Model; hs-cTnI, high-sensitivity cardiac troponin I; AUC, area under curve.
